# Supplementary material
Source: PubMed Central journal article supplement (PMC3993371)
Supplement: JB.01444-13_zjb999093109so1.pdf [file JB.01444-13_zjb999093109so1.pdf]

**Supplementary materials**

**A sporulation factor is involved in morphological change of  
*Clostridium perfringens* biofilm in response to temperature**

**Nozomu Obana, Kouji Nakamura, Nobuhiko Nomura**

## Supplementary materials and methods

**Plasmids.** The *spo0A*-expression vector, pSpo0A was constructed as indicated below. The DNA fragment containing the *spo0A* promoter, *spo0A* ORF and the intrinsic transcriptional terminator was amplified through polymerase chain reaction (PCR) using the primers NOB-0426/NOB-0427 from the genomic DNA of *C. perfringens*. The amplified DNA was digested with EcoRI and BamHI and cloned into the same restriction enzyme site of pJIR418. We attempted to construct an *abrB*-expression vector using the same manner, but these attempts were unsuccessful. We used a lactose-inducible *bgaL* promoter for *abrB* expression (1). The DNA fragments containing the *abrB* ORF and the intrinsic transcriptional terminator or *bgaR* gene and *bgaL* promoter region were PCR amplified using the primers NOB-0478/NOB-0479 or NOB-0488/NOB-0489 from the genomic DNA of *C. perfringens*. These fragments were digested with BamHI and SalI or SacI and BamHI, respectively, and cloned into the SacI/SalI site of pJIR418. The resulting plasmid was named pCPO0281.

## REFERENCE

1. **Hartman AH, Liu H, Melville SB.** 2011. Construction and characterization of a lactose-inducible promoter system for controlled gene expression in *Clostridium perfringens*. *Applied and environmental microbiology* **77**:471–8.

## Supplementary table 1. Oligonucleotides used in this study

| Name     | Sequence 5' to 3'                    | Used for                            |
|----------|--------------------------------------|-------------------------------------|
| NOB-0428 | GGCCtctagaGTCCAGCGCAAAATGGTGGG       | <i>spo0A</i> mutant construction    |
| NOB-0429 | GCGCgaattcTCCTTAACCAACTTTATATATCCA   | <i>spo0A</i> mutant construction    |
| NOB-0495 | GGCCg gatccTCATGAAATAGGAGTTCCAG      | <i>spo0A</i> mutant construction    |
| NOB-0496 | GCGCgtcgacTTTAAGTTCTCGTAAGGCTG       | <i>spo0A</i> mutant construction    |
| NOB-0436 | GGCCgtcgacGCAAATACTTTTTTGATCTCATCGG  | <i>abrB</i> mutant construction     |
| NOB-0437 | GCGCgaattcTCCTCCTTGCATTTTACAACCTTTCG | <i>abrB</i> mutant construction     |
| NOB-0438 | GGCCg gatccTTTAACACTATATCCCCTTATAGTG | <i>abrB</i> mutant construction     |
| NOB-0439 | GCGCtctagaGAGGATACAAGACAAACACTTAAG   | <i>abrB</i> mutant construction     |
| NOB-0576 | GGCCgtcgacTAGGGAAGCCTTAATTGGAG       | <i>pilA2</i> mutant construction    |
| NOB-0577 | GCGCgaattcCATTGGTTTTCTCCTTAAA        | <i>pilA2</i> mutant construction    |
| NOB-0578 | GGCCgaattcAGAAATAATCAATAGTATTA AAAAG | <i>pilA2</i> mutant construction    |
| NOB-0579 | GCGCg gatccAGGCCCTTCTTCTCTATTCA      | <i>pilA2</i> mutant construction    |
| NOB-0538 | GAAAGGGTTCACGCTAATTG                 | <i>pilA2</i> probe                  |
| NOB-0539 | ACTGATGCTGATGTGTTGA                  | <i>pilA2</i> probe                  |
| NOB-0426 | GGCCGAATTCAGAGTGGATGTAAAAGATG        | <i>spo0A</i> probe                  |
| NOB-0427 | GCGCGGATCCCAAATTATCTCACCTCTCTA       | <i>spo0A</i> probe                  |
| NOB-0434 | GGCCCCATGGAATCAACAGGTGTAGTAAGAAGAG   | <i>abrB</i> probe                   |
| NOB-0435 | GCGCGGATCCTTTTTTTAATTCATCTAAACA      | <i>abrB</i> probe                   |
| NOB-0234 | GGCCGAATTCAGGAAACAGCTATGACATG        | <i>ermBP</i> fragment amplification |
| NOB-0240 | GCGCg gatccTTTCAACTTGCCCACTTCGA      | <i>ermBP</i> fragment amplification |
| NOB-0478 | GGCCg gatccAAATAATTTCTATACGACA       | <i>abrB</i> ORF amplification       |
| NOB-0479 | GCGCgtcgacTTAGCTAAAGGGAAATTTAG       | <i>abrB</i> ORF amplification       |
| NOB-0488 | GGCCg agctcAAGTCTAATTAAGACTTTAG      | <i>bgaL</i> promoter amplification  |
| NOB-0489 | GCGCg gatccCATTTTACCCTCCCAATACA      | <i>bgaL</i> promoter amplification  |

**Supplementary fig. 1. Pellicle biofilm formation in *spo0A* and *ctrAB* mutants is complemented using the *spo0A* or *ctrAB*-expression vector.** wild-type *C. perfringens* harboring the empty vector, pJIR418, the *spo0A* mutant harboring pJIR418 or the *spo0A*-expression vector, pSpo0A and the *ctrAB* mutant harboring pJIR418 or the *ctrAB*-expression vector, pCPE6 were cultured at 25°C for 2 days. The edge of the pellicle biofilm formed at the bottom of wells was picked and flipped through gentle pipette aspiration.

**Supplementary fig. 2. The *abrB* mutant cells are elongated and aggregated.** (A) Phase contrast microscopy images of *C. perfringens* wild-type and *abrB* mutant cells harboring pJIR418 and the *abrB*-expression vector, pCPO0281. The *abrB* gene in pCPO0281 is expressed under the control of lactose-inducible *bgaL* promoter. The cells were cultured in GAM broth supplemented with 1 mM lactose, which induces the expression of *abrB* in pCPO0281. (B) Northern blot analysis of *abrB* mRNA in wild-type and *abrB* mutant strains harboring pCPO0281. The minus and plus signs indicate that the cells were grown in the absence and presence of 1 mM lactose, respectively. (C) *C. perfringens* wild-type and *abrB* mutant harboring pCPO0281 were cultured with or without 1 mM lactose. The cells were aggregated in the absence of *abrB* expression.

**Supplementary fig. 3. Toxin expression in the transcriptional regulator mutants at different temperatures.** Northern blot analysis of the genes encoding major toxins in *C. perfringens* using total RNA (2 µg) extracted from the mutant cells grown to the mid-exponential phase at 25 or 37°C. The 23 and 16S rRNAs stained with methylene blue are indicated at the bottom as loading controls.

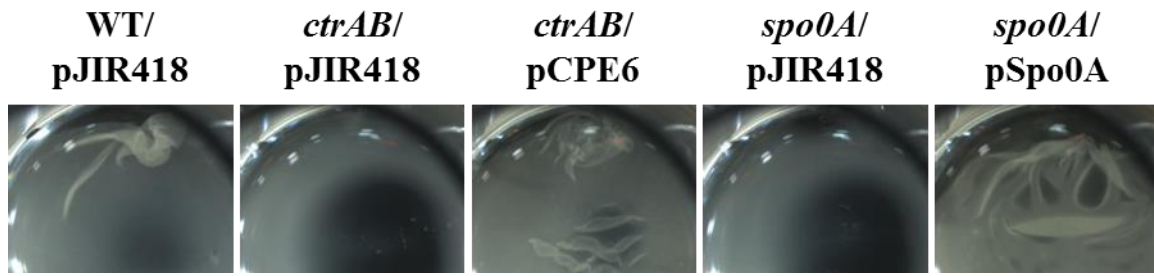

**Supplementary fig. 1**

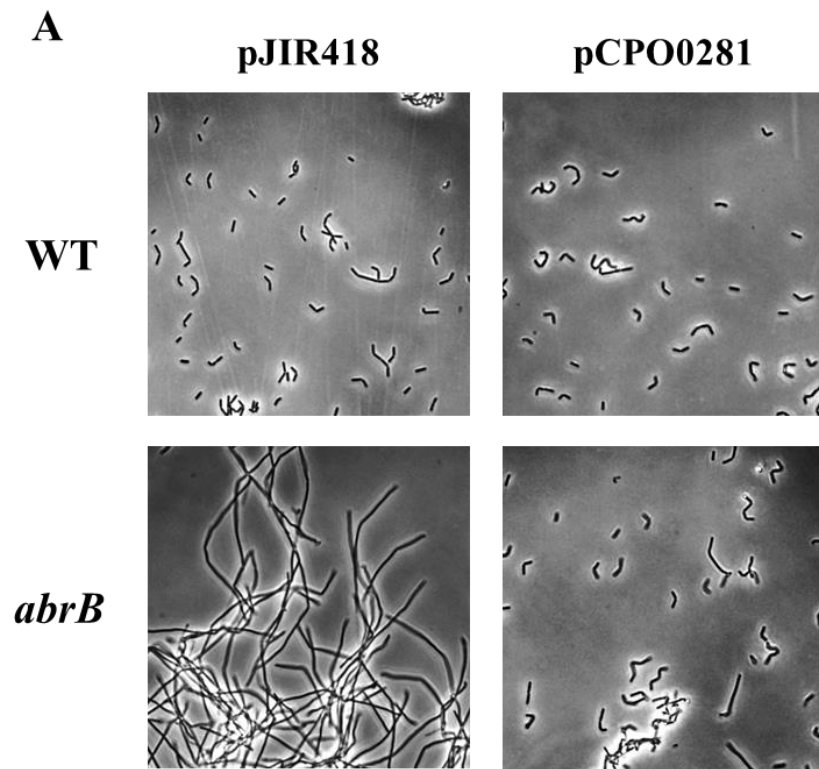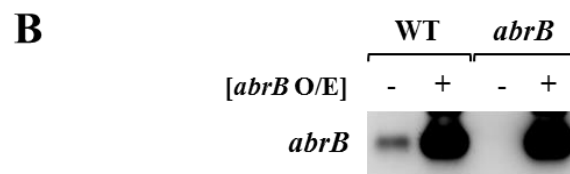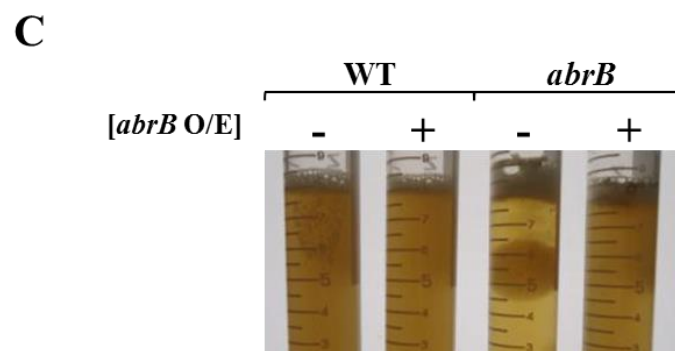

Supplementary fig. 2

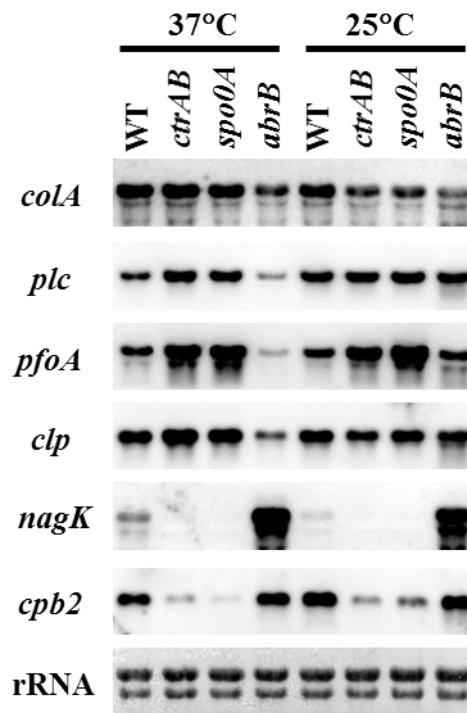

Supplementary fig. 3
